# Supplementary material
Source: Springer Nature journal article supplement (https://www.springermedizin.de/resource/supplementary/12875_2012_783_MOESM1_ESM.pdf/9435642)

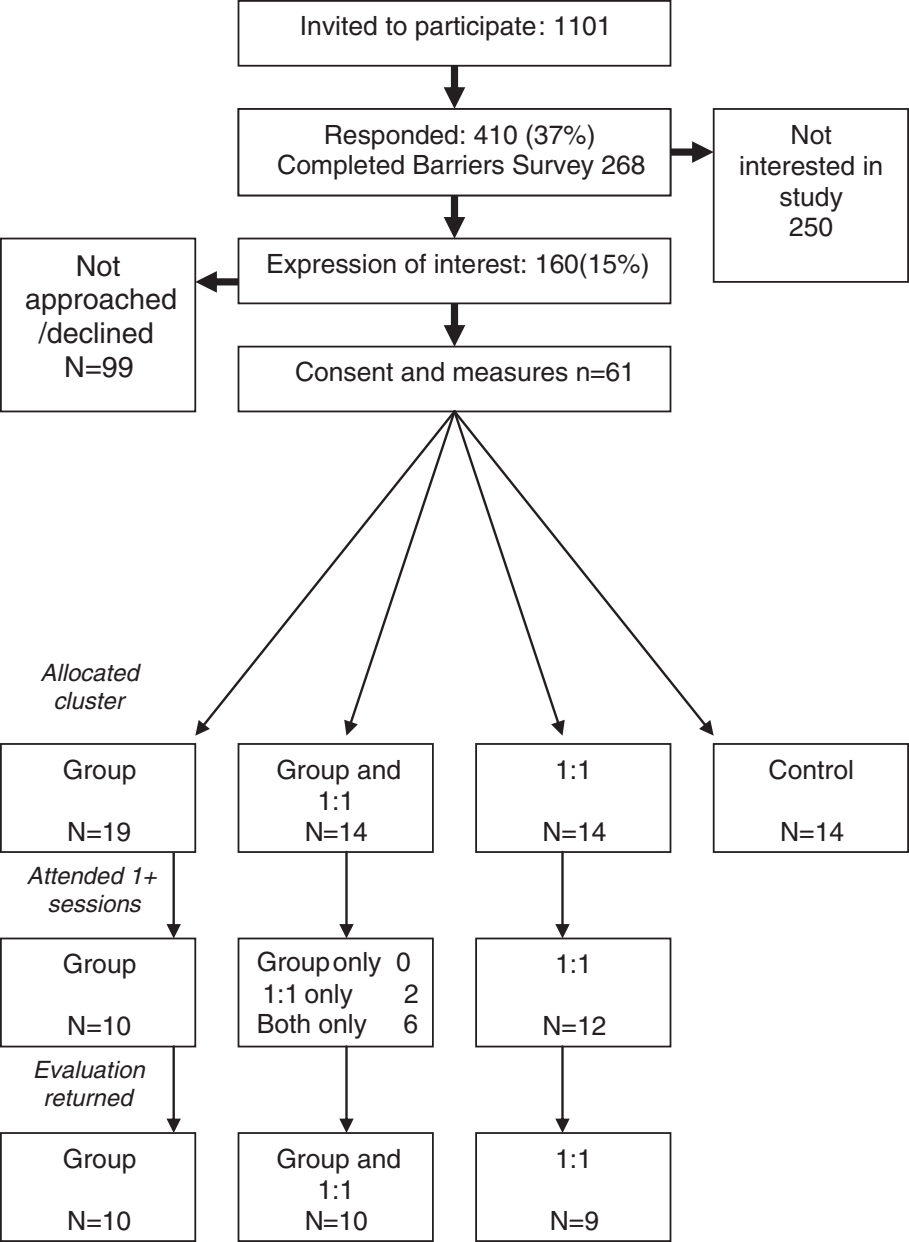

Supplement: MOESM1 [file 9435642]
